# Supplementary material for: Ovatodiolide Suppresses Oral Cancer Malignancy by Down-Regulating Exosomal Mir-21/STAT3/β-Catenin Cargo and Preventing Oncogenic Transformation of Normal Gingival Fibroblasts
Source: MDPI journal article supplement (doi:10.3390/cancers12010056), 2019-12-24
Supplement: s1 [file s1]

**Supplementary Table 1. Primary antibodies used in this study and testing conditions**

| No. | Target           | Dilution | Company and Catalog No.                                                     | Predicted MW (kDa) | Observed MW (kDa) |
|-----|------------------|----------|-----------------------------------------------------------------------------|--------------------|-------------------|
| 01  | GAPDH            | 1:5000   | Proteintech, GAPDH Rabbit pAb, 10494-1-AP                                   | 36                 | 36                |
| 02  | PI3K             | 1:1000   | EnoGene, PI2-kinase p85- $\alpha/\gamma$ (Ab-467/199) Rabbit mAb, E11-1224B | 85                 | 85~100            |
| 03  | $\beta$ -catenin | 1:1000   | Cell Signaling, $\beta$ -Catenin (6B3) Rabbit mAb , #9582P                  | 92                 | 100               |
| 04  | mTOR             | 1:1000   | Cell Signaling, mTOR (7C10) Rabbit mAb, #2983                               | 289                | 289               |
| 05  | STAT3            | 1:1000   | Proteintech, STAT3 Rabbit pAb, 10253-1-AP                                   | 79-86              | 79-86~100         |
| 06  | TGF $\beta$ 1    | 1:1000   | Proteintech, TGF $\beta$ 1 Rabbit pAb, 18978-1-AP                           | 43                 | 44                |
| 07  | CD63             | 1:1000   | Abcam, CD63 Rabbit pAb, ab216130                                            | 26                 | 40                |
| 08  | CD9              | 1:1000   | Abcam, CD9 (EPR2949) Rabbit mAb, ab92726                                    | 25                 | 40                |
| 09  | $\alpha$ -SMA    | 1:1000   | Proteintech, $\alpha$ -SMA Rabbit pAb, 14395-1-AP                           | 43                 | 43                |
| 10  | Vimentin         | 1:1000   | Cloud Clone, Vimentin Rabbit pAb, PAB040Hu01                                | 52-58              | 52-58             |
| 11  | FAP              | 1:1000   | MYBioSource, FAP alpha (MBS8244119) Rabbit pAb, MBS8241750                  | 80-100             | 80-100            |
| 12  | CD133            | 1:1000   | Abcam, CD133 Rabbit pAb, ab19898                                            | 123                | 123               |
| 13  | nestin           | 1:1000   | Abcam, nestin Mouse mAb, ab22035                                            | 176                | 176               |

**Supplementary Table 2. QPCR primer sequences used in this**

| <b>mRNA</b>  | <b>Forward sequence</b>  | <b>Reverse sequence</b>    |
|--------------|--------------------------|----------------------------|
| <b>PI3K</b>  | AGTAGGCAACCGTGAAGAAAAG   | GAGGTGAATTGAGGTCCCTAAGA    |
| <b>TGFb1</b> | CACCCGCGTGCTAATGG        | TGTGTACTCTGCTTGAAC TTGTCAT |
| <b>mTOR</b>  | CTGGGACTCAAATGTGTGCAGTTC | GAACAATAGGGTGAATGATCCGGG   |
| <b>STAT3</b> | ACCAGCAGTATAGCCGCTTC     | GCCACAATCCGGGCAATCT        |
| <b>Akt</b>   | TCACCTCTGAGACCGACACC     | ACTGGCTGAGTAGGAGAACTGG     |
| <b>GAPDH</b> | CATCATCCCTGCCTCTACTG     | GCCTGCTTCACCACCTTC         |
